# Supplementary material for: The STAT1/HMGB1/NF-κB pathway in chronic inflammation and kidney injury after cisplatin exposure
Source: PubMed Central journal article supplement (PMC10240827; doi:10.7150/thno.81406), 2023-05-08
Supplement: thnov13p2757s1.pdf [file thnov13p2757s1.pdf]

# Fu et al. Supplementary material

1

2

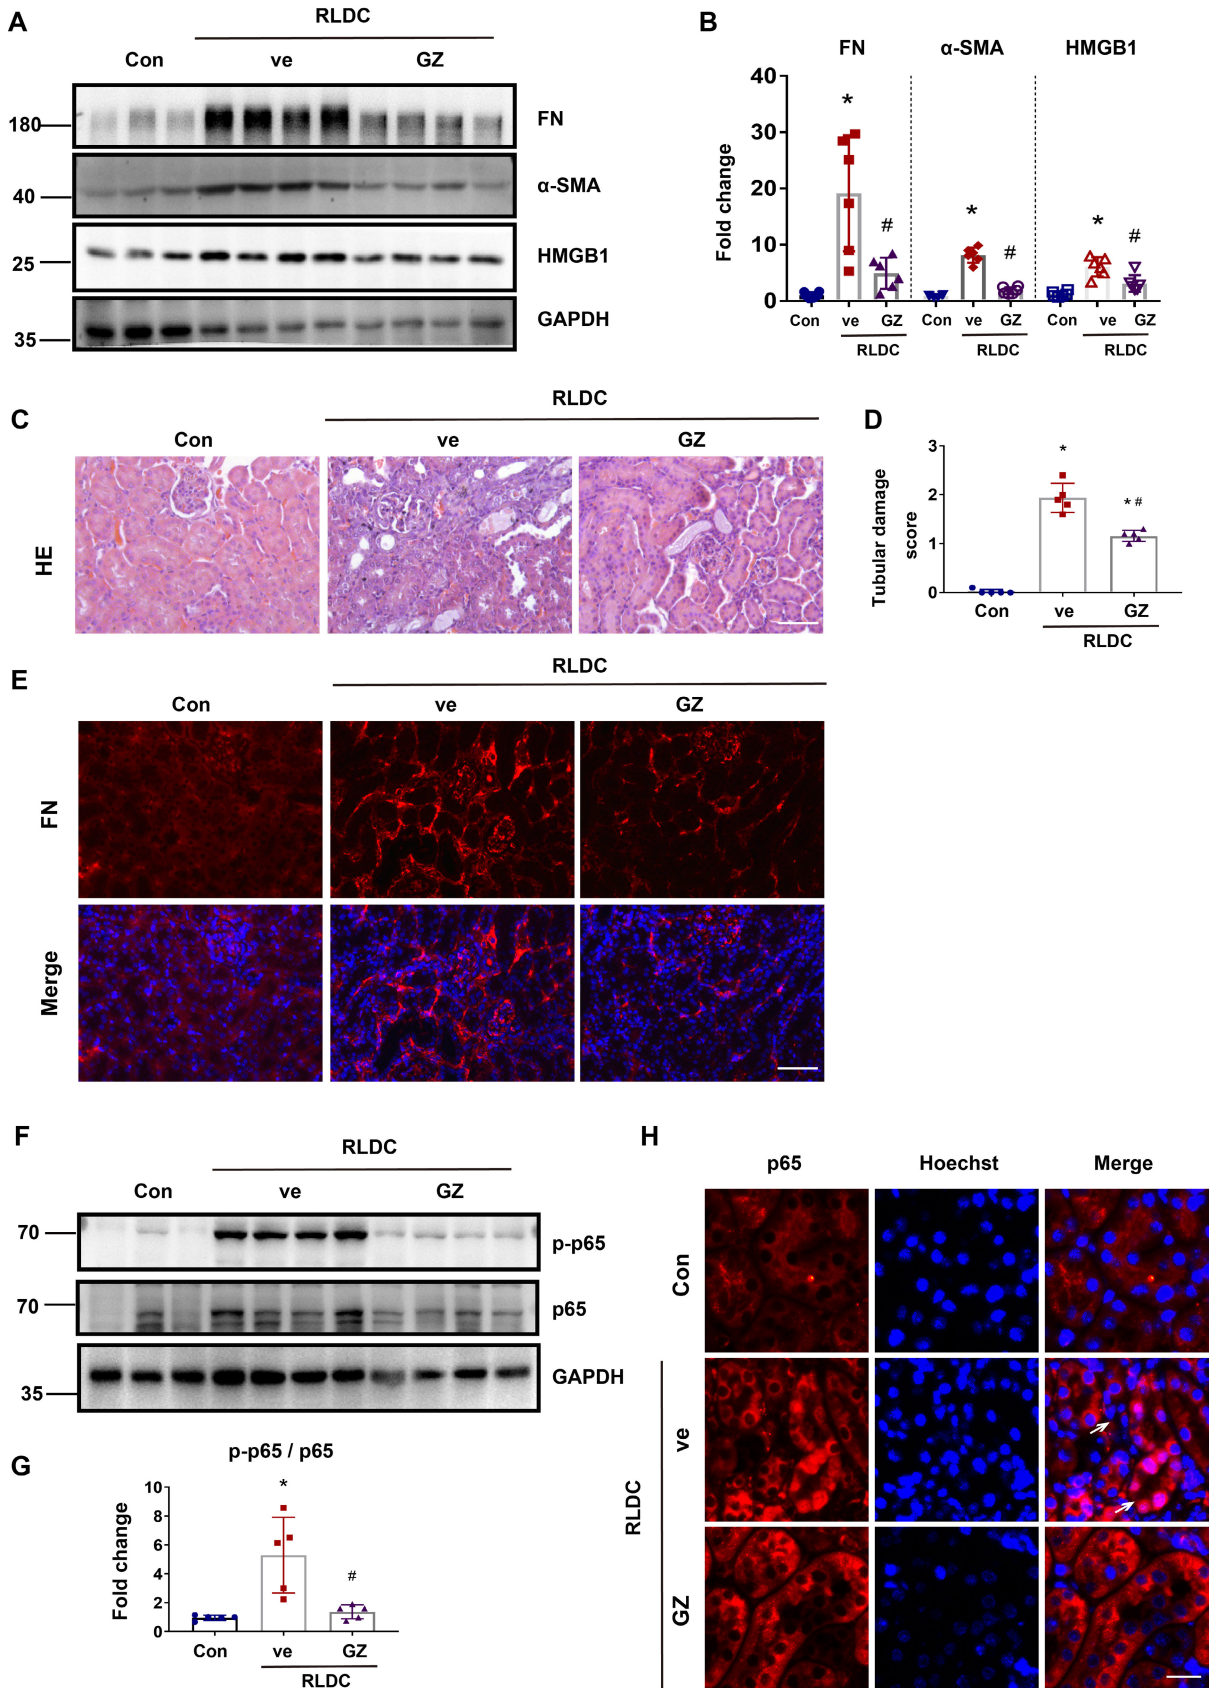

3

4 **Figure S1. Effect of Glycyrrhizin (GZ), a pharmacological inhibitor of HMGB1, on kidney**  
 5 **repair after RLDC treatment.** C57BL/6 mice received a weekly injection with 8 mg/kg cisplatin  
 6 for four weeks. After the last cisplatin injection, 50 mg/kg glycyrrhizin (GZ) were injected daily for  
 7 one week for sample collection and analysis. (A) Representative immunoblots of FN,  $\alpha$ -SMA and  
 8 HMGB1 in kidney tissues. (B) Densitometric analysis of FN,  $\alpha$ -SMA and HMGB1 protein levels in  
 9 immunoblots. (C) Representative renal histology of hematoxylin and eosin (HE)-staining showing  
 10 the beneficial effect of GZ in RLDC-treated mice. Scale bar = 50  $\mu$ m. (D) Kidney tubule damage  
 11 score. (E) Representative images of FN immunofluorescence staining of kidney tissues. Scale bar =  
 12 50  $\mu$ m. (F) Representative immunoblots of p-p65, p65 in kidney tissues. (G) Densitometric analysis  
 13 of p-p65/p65 in immunoblots. (H) Representative images of immunofluorescence staining used to  
 14 observe p65 entry into the nucleus. Quantitative data are expressed as mean  $\pm$  SEM. N = 5. \*  $P < 0.05$   
 15 vs. the untreated control group (Con); #  $P < 0.05$  vs. (RLDC+ve) group.  
 16

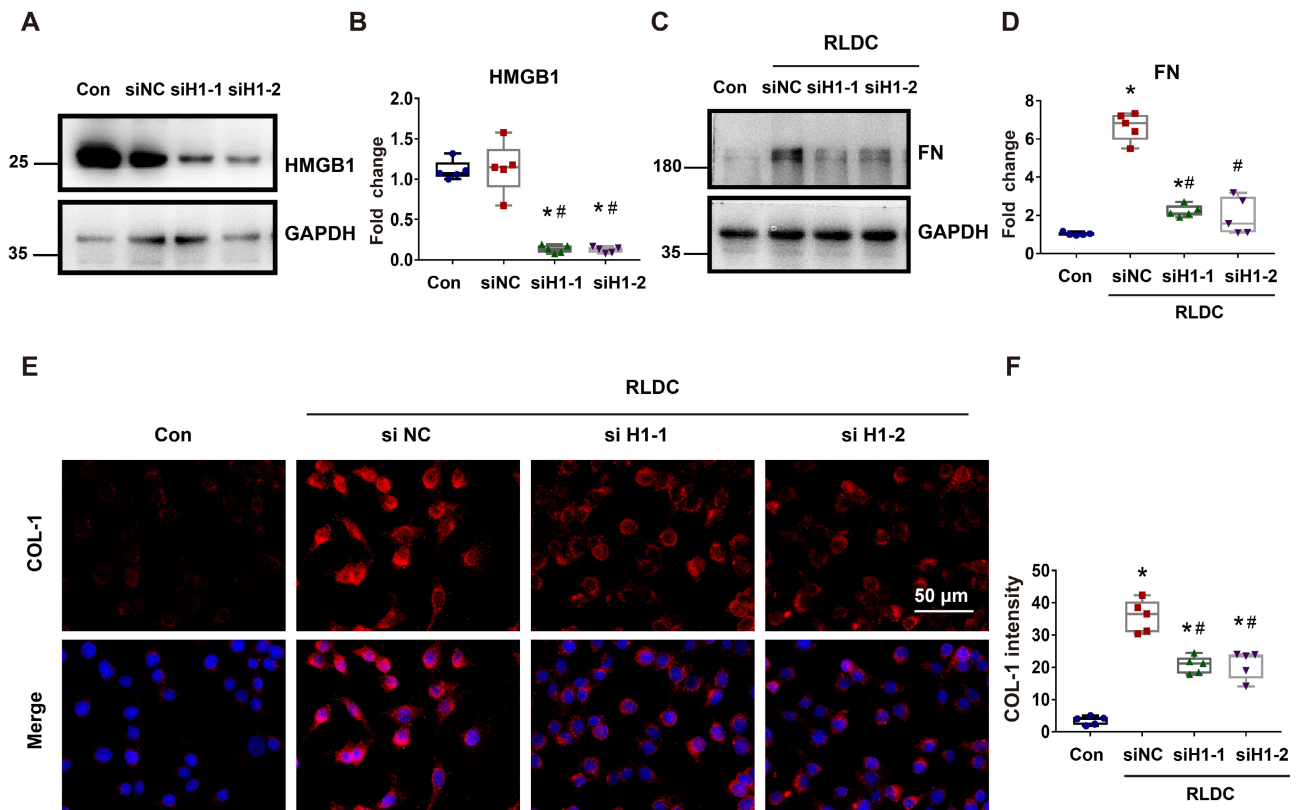

17  
 18  
 19 **Figure S2. *Hmgb1* knockdown reduces RLDC–induced fibrotic phenotype in renal tubular**  
 20 **cells.** BUMPT cells were transfected with 50 nM of HMGB1 siRNA1 (siH1-1), HMGB1 siRNA2  
 21 (siH1-2), or a negative control siRNA (siNC), and then subjected to 4 days of RLDC treatment or

22 control incubation (Con). (A) Representative immunoblots of HMGB1 and GAPDH (loading  
 23 control). (B) Densitometry of HMGB1 in immunoblots. (C) Representative immunoblots of FN and  
 24 GAPDH. (D) Densitometry of FN in immunoblots. (E) Immunofluorescence analysis of COL-1  
 25 (red) in BUMPT cells with Hoechst staining of their nuclei (blue). Scale bar = 50  $\mu$ m. (F)  
 26 Quantitative analysis of COL-1 staining. Quantitative data are expressed as mean  $\pm$  SEM. N = 5. \*  
 27  $P < 0.05$  vs. the control group without RLDC treatment (Con). #  $P < 0.05$  vs. RLDC/siNC group.

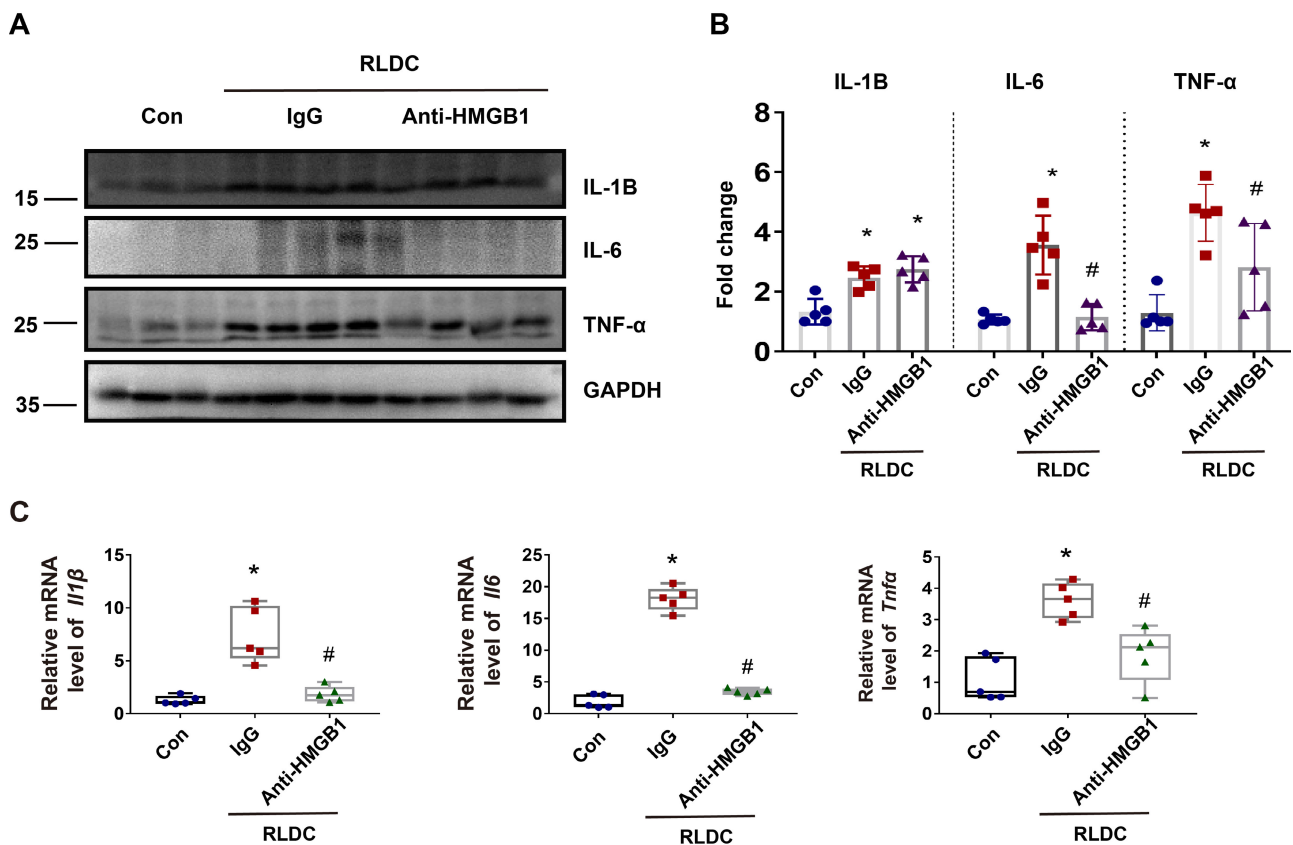

28  
 29 **Figure S3. Anti-HMGB1 neutralizing antibody suppresses *Il-1 $\beta$* , *Il-6* and *Tnf- $\alpha$*  expression in**  
 30 **post-RLDC mouse kidneys.** Male C57BL/6 mice received a weekly injection of 8 mg/kg cisplatin  
 31 for four weeks. After the last injection, anti-HMGB1 antibody (Anti-HMGB1) or IgG isotype control  
 32 (IgG) were injected daily for one week until sample collection. (A) Representative immunoblots of  
 33 IL-1 $\beta$ , IL-6, TNF- $\alpha$  and GAPDH (loading control). (B) Densitometry of IL-1 $\beta$ , IL-6, TNF- $\alpha$  in  
 34 immunoblots. (C) Relative quantification of the levels of *Il-1 $\beta$* , *Il-6*, and *Tnf- $\alpha$*  mRNAs by qRT-PCR.  
 35 The expression of the target genes was normalized to GAPDH mRNA and expressed as fold change  
 36 compared to control kidneys (Con). N = 5. \* $P < 0.05$  vs. the control group (Con), # $P < 0.05$  vs.  
 37 RLDC/control isotype-treated group.

38

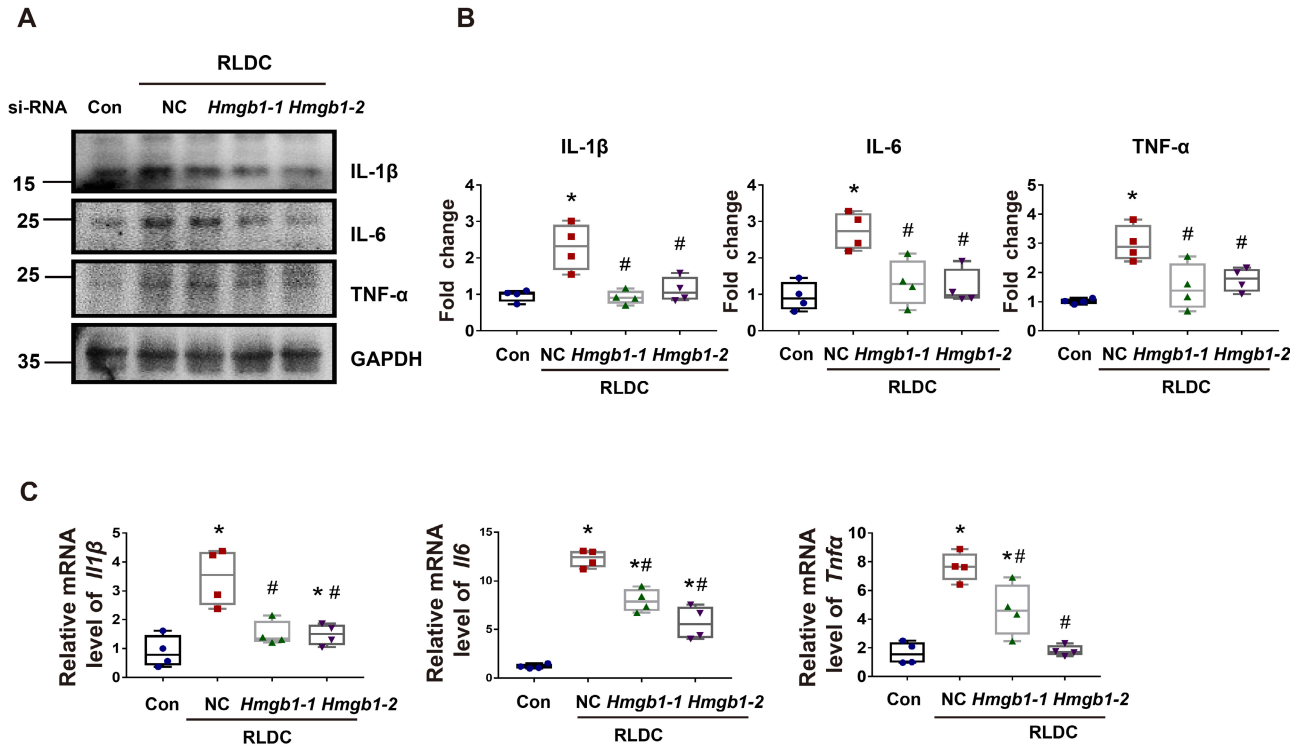

39  
 40 **Figure S4. *Hmgb1* knockdown decreases pro-inflammatory cytokines in RLDC-treated renal**  
 41 **tubular cells.** BUMPT cells were transfected with 50 nM *Hmgb1* siRNA (siH1-1, siH1-2), or  
 42 negative control siRNA (siNC), and then subjected to 4-day basic RLDC treatment. Control cells  
 43 were left untreated (Con). (A) Representative immunoblots detecting IL-1 $\beta$ , IL-6, TNF- $\alpha$ , and  
 44 GAPDH. (B) Quantitative analysis of IL-1 $\beta$ , IL-6, and TNF- $\alpha$  immunoblots. (C) Relative  
 45 quantification of the levels of *Il-1 $\beta$* , *Il-6*, and *Tnf- $\alpha$*  mRNAs by qRT-PCR. The expression of the target  
 46 genes was normalized to GAPDH mRNA and expressed as fold change compared to control cultures  
 47 (Con). Data are expressed as mean  $\pm$  SEM. N = 4. \*P<0.05 vs. the untreated cultures (Con); #P <  
 48 0.05 vs. RLDC/control siRNA-treated cultures.

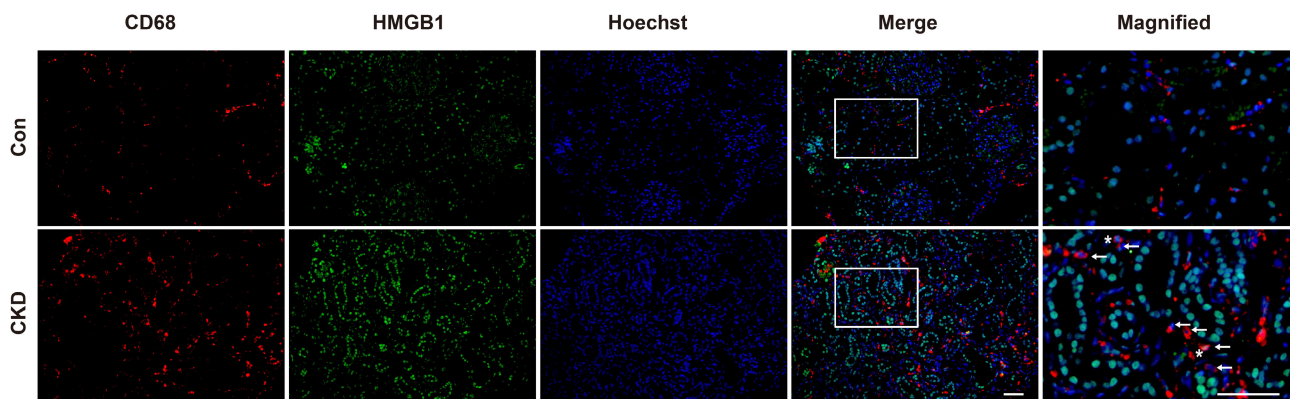

49  
 50 **Figure S5. Immunofluorescence co-staining of HMGB1 with CD68 in renal biopsies of CKD**  
 51 **patients.** To further validate the expression of HMGB1 produced by macrophages in CKD patients,  
 52 we performed immunofluorescence co-staining of CD68 and HMGB1 using tissue samples from 3



53 control patients (normal kidney tissue adjacent to cancer) and 7 CKD patients with different  
 54 etiologies, including IgA nephropathy (n = 2), and hypertensive nephropathy (n = 5). In CKD with  
 55 multifocal tubular atrophy and interstitial fibrosis, HMGB1 expression was significantly increased  
 56 in renal tubular cells and in some CD68+ macrophages. Arrows refers to CD68+ cells in the  
 57 interstitium, and \* refers to CD68+HMGB1+ cells. Scale bar = 50  $\mu$ m.

58 **Table S1. Primer sequences used for quantitative RT-PCR.**

| Gene                           | Forward (5'-3')          | Reverse (5'-3')              |
|--------------------------------|--------------------------|------------------------------|
| <i>Il-1<math>\beta</math></i>  | GAAATGCCACCTTTTGACAGTG   | CTGGATGCTCTCATCAGGACA        |
| <i>Il-6</i>                    | TCCAGTTGCCTTCTTGGGAC     | GTACTIONCAGAAGACCAGAGG       |
| <i>Tnf-<math>\alpha</math></i> | CAGGCGGTGCCTATGTCTC      | CGATCACCCCGAAGTTCAGTAG       |
| <i>Hmgb1</i>                   | GGGAGGAGCACAAGAAGAAGCA   | GGGCGGTACTCAGAACAGAACA<br>AG |
| <i>Tlr2</i>                    | GACGCTGGAGGTGTTGGATGTTAG | AAAGTGGTTGTGCGCTGCTTCC       |
| <i>Tlr4</i>                    | CCGCTTTCACCTCTGCCTTCAC   | TGCCGTTTCTTGTTCTTCCTCTG<br>C |
| <i>Myd88</i>                   | CGCCGCCTATCGCTGTTCTTG    | TGCCTCCCAGTTCCTTTGTTTGT<br>G |
| <i>Gapdh</i>                   | AGGTCGGTGTGAACGGATTTG    | GGGGTCGTTGATGGCAACA          |

59

60 **Table S2. Demographic and clinical information of the CKD patients.**

| Number | Age | Gender | CKD staging | eGFR(ml/min/1.73m <sup>2</sup> ) | Diagnosis                | Tubular atrophy (%) | Interstitial fibrosis (%) |
|--------|-----|--------|-------------|----------------------------------|--------------------------|---------------------|---------------------------|
| 1      | 52  | M      | IIIa        | 48.7                             | IgA nephropathy          | 70                  | 70                        |
| 2      | 36  | F      | IIIa        | 45.5                             | IgA nephropathy          | 30                  | 30                        |
| 3      | 64  | M      | IIIb        | 32.3                             | Hypertensive nephropathy | 30                  | 30                        |
| 4      | 25  | M      | IIIa        | 46.1                             | Hypertensive nephropathy | 70                  | 70                        |
| 5      | 59  | M      | IV          | 16.7                             | Hypertensive nephropathy | 30                  | 30                        |
| 6      | 55  | M      | II          | 72.3                             | Hypertensive nephropathy | 30                  | 30                        |
| 7      | 38  | M      | IV          | 19                               | Hypertensive nephropathy | 70                  | 70                        |

61

62

63

64
